# Supplementary material
Source: publisher site journal article supplement (https://www.dovepress.com/article/398620)
Supplement: Supplementary file 1 [file get_supplementary_file.php]

| **Supplementary table 1** Primer sequences used for qRT-PCR | |
| --- | --- |
| Gene | Primer sequence |
| UCP1 | F: 5’- AGGTCCAAGGTGAATGCCC-3’ |
| R: 5’- TTACCACAGCGGTGATTGTTC-3’ |
| hsa_circ_0006168 | F: 5’- TGAACTTGGTCGGCTCTTCCA-3’ |
| R: 5’- GGCTACCTCCTCTGCTGACA-3’ |
| hsa_circ_0026337 | F: 5’- TCACCTGTGAGTGTGTGCTCA-3’ |
| R: 5’- TCATGATGGAGGGGATGGCG-3’ |
| hsa_circ_0007507 | F: 5’- AGAAGATGGATGGATGTGGGTTACA-3’ |
| R: 5’- AACTGCCAGACTTCCCTGCC-3’ |
| hsa_circ_0004789 | F: 5’- CCAATGCCATCAACCGCCTC-3’ |
| R: 5’- GCCCAGATCCATCAACCACCA-3’ |
| hsa_circ_0030162 | F: 5’- TGTGATTTATTTGGAGTGGAGGCA-3’ |
| R: 5’- GCGGAGGCATTTCCACCAAT-3’ |
| hsa_circ_0059665 | F: 5’- GACGCCTCCAGATGCCCTTA-3’ |
| R: 5’- GGGCGTTCTTCCACCAGACT-3’ |
